# Supplementary material for: Investigation of electrical transport properties in solution-processed Bi2Se3–AgMnOOH nanocomposite
Source: Royal Society of Chemistry journal article supplement (doi:10.1039/d3cp00642e), 2023-01-01
Supplement: d3cp00642e1.pdf [file d3cp00642e1.pdf]

## Investigation of Electrical Transport Properties in Solution-Processed $\text{Bi}_2\text{Se}_3\text{-AgMnOOH}$ Nanocomposite

Rishika Chakraborty<sup>a,‡</sup>, Sutanu Das<sup>b,‡</sup>, Siddheswar Rudra<sup>c</sup>, Arpan Kumar Nayak<sup>d</sup>, Pradip K. Maji<sup>e</sup>, Upendranath Nandi<sup>b,\*</sup>, Mukul Pradhan<sup>f,\*</sup>

*a Department of Chemistry, National Institute of Technology Meghalaya, Shillong, 793003, Meghalaya, India.*

*b Department of Physics, Scottish Church College, 1 & 3 Urquhart Square, Kolkata, 700006, West Bengal, India.*

*c Materials Science Centre, Indian Institute of Technology, Kharagpur 721302, India.*

*d Department of Energy Engineering, Konkuk University, 120 Neungdong-ro, Seoul 05029, Republic of Korea.*

*e Department of Polymer & Process Engineering, Indian Institute of Technology, Roorkee, Saharanpur Campus, Saharanpur, 247001, Uttar Pradesh, India.*

*f Department of Chemistry, National Institute of Technology Warangal, Warangal, 506004, Telangana, India.*

### Corresponding Authors

*\*E-mail: unphys@scottishchurch.ac.in (Upendranath Nandi)*

*\*E-mail: mukulchem@gmail.com/mukulchem@nitw.ac.in (Mukul Pradhan)*

*‡These authors contributed equally.*

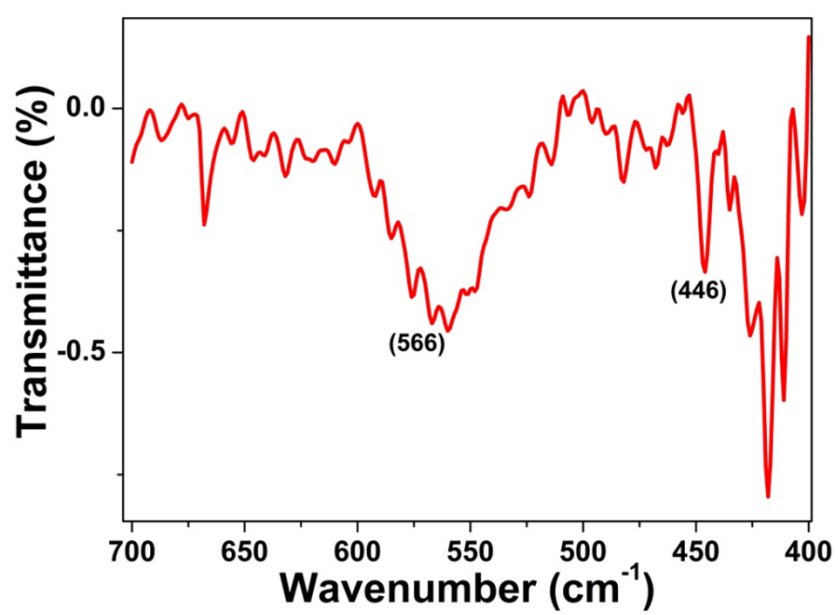

**Figure S1.** FT-IR spectra of Bi<sub>2</sub>Se<sub>3</sub>-AgMnOOH nanocomposite.

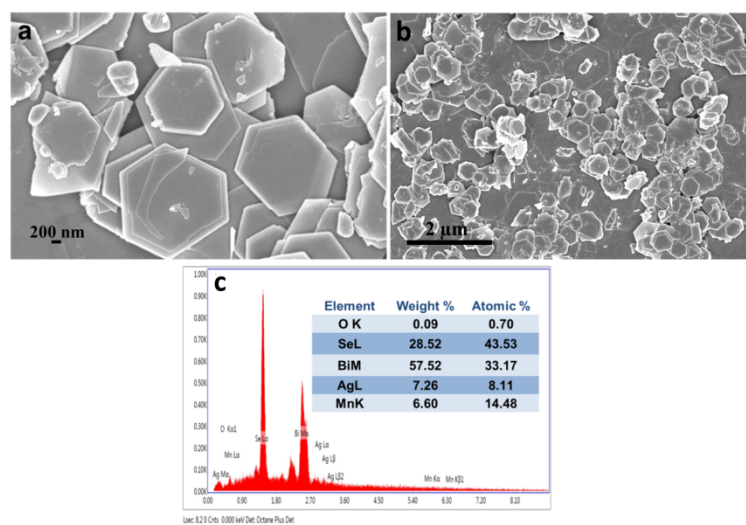

**Figure S2.** (a)-(b) FESEM images and (c) EDX elemental spectra of  $\text{Bi}_2\text{Se}_3\text{-AgMnOOH}$  nanocomposite.

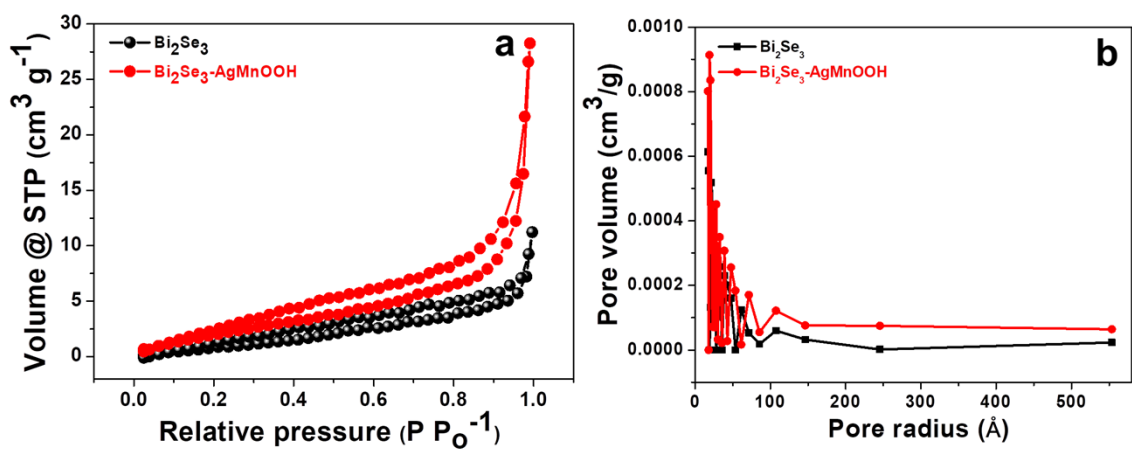

**Figure S3.** (a) BET and (b) BJH plots of bare  $\text{Bi}_2\text{Se}_3$  and  $\text{Bi}_2\text{Se}_3\text{-AgMnOOH}$  nanocomposite.
